# Supplementary material for: Distribution of the Water-Soluble Astaxanthin Binding Carotenoprotein (AstaP) in Scenedesmaceae
Source: MDPI journal article supplement (doi:10.3390/md19060349), 2021-06-20
Supplement: s1 [file s1]

*S. acutus* (ACB06751): pI=3.95, no putative glycosylation site

MKLFAAVVLVTCALASVQGRTLQQAAAAPTTVAQALAQTPSLSTLNAAVQAAGIDIPADAAW***TIF***  
***APKNEAF***SDDDDIREETGLTAQQLQPENKQALTQLLQYHIVPSGALRAAQLQDGGQQLTTALAGAA  
PLKVDIEDEKVEIEVPDAGNDDDGDDADVEQADMTVG***NSVIHIVDEVLI***PASLRGSRQPARG

*C. vacuolata* (CvacAstaP1 MZ063685): pI=6.12, 10 putative glycosylation sites

MRTLALFVLACTIGAAYGRELLQAAPAAASYNTLAQAVAAANASAP***NLS***SILLAAVKAA***NVS***GALGP  
***NTTW******TILAPT******NQAF***TSRL***NES***LGITPQQLQPANCKTLVEVLSYHVIPSGAVYSS***NLT***NGQEVPT  
ALAGADPLTVAIN***NRT***VTFEGAEN***NAT***VTVANIRAG***RSVIHIVINDVLL***PAGVG***NSSNTT***AEGEST  
APGAAGSRDVAAGSAVGGGSTSAPAPAAAKGAAGAAQVPAVLLASMLLIGMLF

*C. vacuolata* (CvacAstaP2 MZ063686): pI=10.3, 2 putative glycosylation sites

MARNAIIVFLAIVCLVAGATA***DKADPAKKKSAPSYPSLS***DAVKAAATAPQLTTLAAINAAGVASA  
LKPDTAW***TILAPT******NKAF***ETRLAKL***NVT***ADALLKNKDLLVKVLSYHVIPSGAVYSSQLKDKQTVAT  
ALK***NAT***LTVKIYGKNVAFKGPVNKAKVVADIKAG***KSVVHVIDDVLL***VPPGVVSPEVAQKWKAIEYK  
SKKDASMKKMDKP

*Crl. variabilis* (EFN56922): pI=4.15, 1 putative glycosylation site

MARHSAQSYDNIGELLDDTPKLSILKAALEAAGLDELASDDALEA***TLFAPT******DKAF***ADAITAL***NLT***  
AEEVLGDKDLLTTVLSYHVIPGVAVEAAALEEGQILQITILEGAAGQLKYYTFKGLPRLRTTADQV  
ARITETDISAG***KAIVHLIDAVLI***PGDEFFSAPAPGPSP

*Cmy. reinhardtii* (XP001700577): pI=6.33, 15 putative glycosylation sites

MARWTRPGASTILVASCLLLAVAGSSAQ***Q***TI***LQAIQSANLT***LLAAGLQVADLATT***LNST***TG***PNITLF***  
APSDALLAMTAALNTTPNALLTLGPKVAPVFTYHAITTPLLAADIP***TG***DT***PYATLNTGLNLT***TVSK  
AA***NGS***VVVRA***LGSDANVIRTDITAGGAVVHVIDSVLLPFFLSV***ASAAT***TRTPQLSSLLSAVAS***NGLA  
PALSNPNL***NVTVFAPVNDAF******NAS***SAYLTSV***NAS***ITDVLT***YHVATSRVLNG***SEVTAS***PITLTLNSR***  
***ANLT***TVARDGNNVVVTPVGATAATVLAANIPVGLDLTTGGP***RTFVHLVNAVLL***PFYTTVANAAERAG  
LTTLVAAVAASDPAFLAAVTDPTFRG***TILAPSNA******AF***AATLASL***NVT***AAQLLADKDNLRRI***LNAHII***  
PNAAVFSNQLSN***QTVNTT***GGALLTVSIGNIVRFNAAKSSAKVVAADV***SIGNGRAVVHVIDRVLL***  
PADLTLPTPYVTVAGAAQAANLSTLLAAVTASDASFLTTLTDPDFNGTVLAPTPLSDCHVALLMPN  
AAFTAALTALGV***NAT***QLLADKDNLRRI***LNAHII***TPGAVRSSQLVNNQNITTLDGVLTVR***INGT***GVF  
FVAAKSTAKVVTPDVIAG***NAVVHTIDFVLL***PASVTLTTGGSGGGGGSGGG***GAAGMASPSVLTLLSSA***  
LAFLALFAFGRF

**Figure S1.** The deduced amino acid sequences of the AstaP orthologs. N-terminal signal peptides are highlighted by yellow. H1 and H2 motifs of the fasciclin domains are shown in boldface italics. Potential sites for N-linked glycosylation are shown in red fonts.
